STUDY PROTOCOL

# Treating prolonged grief disorder with CBT for insomnia: A replicated single-case experimental study protocol

Thomas A. de Lang<sup>1\*</sup>, Peter J. de Jong<sup>1</sup>, Marike Lancel<sup>1,2</sup>, Jaap Lancee<sup>3</sup>, Maarten C. Eisma<sup>1</sup>

**1** University of Groningen, Groningen, the Netherlands, **2** GGZ Drenthe Mental Institute, Centre of Expertise on Sleep and Psychiatry, Assen, the Netherlands, **3** University of Amsterdam, Amsterdam, the Netherlands

\* [t.a.de.lang@rug.nl](mailto:t.a.de.lang@rug.nl)

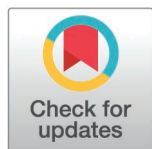

**OPEN ACCESS**

**Citation:** de Lang TA, de Jong PJ, Lancel M, Lancee J, Eisma MC (2026) Treating prolonged grief disorder with CBT for insomnia: A replicated single-case experimental study protocol. *PLoS One* 21(2): e0341802. <https://doi.org/10.1371/journal.pone.0341802>

**Editor:** Avanti Dey, Public Library of Science, UNITED STATES OF AMERICA

**Received:** January 5, 2026

**Accepted:** January 7, 2026

**Published:** February 12, 2026

**Copyright:** © 2026 de Lang et al. This is an open access article distributed under the terms of the [Creative Commons Attribution License](https://creativecommons.org/licenses/by/4.0/), which permits unrestricted use, distribution, and reproduction in any medium, provided the original author and source are credited.

**Data availability statement:** No datasets were generated or analysed during the current study. All relevant data from this study will be made available upon study completion.

**Funding:** Our work was supported by Stichting tot Steun VCVGZ (Project number: 326) The funder did not play a role in the study design,

## Abstract

The most effective treatments of prolonged grief disorder (PGD) result in clinically relevant effects in only about half of the patients and can be emotionally taxing. This points to the importance of improving currently available treatment options. One promising target for enhancing the efficacy of the treatment of PGD is insomnia. Sleep disturbances are very common in bereavement and are proposed to play a causal role in maintaining PGD symptoms. Therefore, targeting sleep problems may be an effective treatment for people with PGD and insomnia disorder. This protocol presents a study, registered in the Dutch Trial Register (NL86238.042.24) that will evaluate the effects of cognitive behavioral therapy for insomnia (CBT-I) in individuals with comorbid PGD and insomnia using a replicated single-case experimental design (R-SCED). Twenty adults meeting diagnostic criteria for both disorders will be randomized to complete baseline between 5 and 14 weeks, after which they will receive CBT-I. Weekly PGD and insomnia symptom measures will be administered throughout the baseline (5–14 weeks), intervention (7–8 weeks) and post-intervention phase (4–13 weeks). Outcomes will be examined using visual inspection, Tau-U indices, and randomization tests. Results: We expect CBT-I to reduce both insomnia and PGD symptoms. This study will form the first systematic evaluation of CBT-I for PGD. Findings may help establish a novel, less emotionally demanding treatment option for bereaved individuals.

## Introduction

The death of a loved one is one of the most distressing experiences that people will face during their lifetime. While most individuals manage to cope with the loss using their own coping strategies, a small but notable subset of bereaved adults experience

in the writing of the report or in the decision to submit the article for publication.

**Competing interests:** The authors have declared that no competing interests exist.

persistent, severe, and disabling grief, also termed prolonged grief (3–4%; [1,2]). Prolonged grief disorder (PGD) has recently been introduced in the Diagnostic and Statistical Manual of Mental Disorders (5th edition, text revision, DSM-5-TR; [3]) and the International Classification of Diseases-11<sup>th</sup> edition (ICD-11; [4]). Core symptoms include persistent and severe yearning and/or cognitive preoccupation with the deceased, combined with secondary symptoms indicative of emotional pain, experienced for a prolonged period following bereavement (a minimum of six months for the ICD-11 and one year for the DSM-5-TR).

Recent systematic reviews and meta-analyses indicate that the most effective and well-studied prolonged grief-tailored interventions, cognitive behavioral therapy (CBT), show medium to large effect sizes [5,6]. However, clinically relevant changes are observed in no more than half of the participants [7,8], leaving many treatment-seeking bereaved people underserved. Additionally, CBT for prolonged grief can be emotionally taxing for patients as a key component is exposure to the reality of the loss [9] and drop-out rates are relatively high (e.g., [10]). Thus, expanding the treatment options for people dealing with severe and persistent grief reactions is important.

One potential target for the treatment of prolonged grief is sleep disturbances. Sleep disturbances are among the most common complaints of the bereaved [11,12], and it has been argued that sleep problems play a causal role in the development and maintenance of prolonged grief symptoms [13]. A systematic review showed that sleep problems are often comorbid with prolonged grief, the severity of insomnia symptoms is related to the severity of the prolonged grief symptoms both concurrently and longitudinally, and sleep problems do not fully remit after psychotherapy for PGD [13].

Recent longitudinal studies yield evidence consistent with the view that sleep disturbances contribute to the perpetuation of prolonged grief symptoms. For example, a study investigating the relation between spontaneous fluctuations in insomnia and prolonged grief symptoms and vice versa over the course of a year, showed that fluctuations in insomnia symptoms were predictive of changes in prolonged grief symptoms six months later [14]. Additionally, a large Dutch cohort study showed that sleep problems prior to bereavement, were predictive of experiencing prolonged grief at follow-up (median of six years later; [15]). Similarly, another longitudinal study [16] linked the typical trajectories of insomnia symptoms following a loss with the chance of experiencing PGD “caseness” at the one-year follow-up. Bereaved adults who showed continuous clinical insomnia symptom levels were more likely to have probable PGD at one-year follow-up compared to participants showing recovery, characterized by reduced insomnia symptom levels over time, or showed resilience, characterized by non-clinical symptom trajectories. Interestingly, the trajectories of insomnia symptoms and prolonged grief symptoms were strongly correlated, suggesting that these symptoms are intertwined and move together over time [16]. Together, these findings are consistent with the view that sleep problems constitute a risk factor for prolonged grief, and that targeting sleep disturbances in therapy may be an effective approach for people with comorbid PGD and insomnia disorder.

The exact mechanisms by which sleep might affect mental health problems is unclear. However, it has been hypothesized that sleep, especially rapid eye movement sleep (REM-sleep), plays a crucial role in detangling the emotional response from an emotional memory while simultaneously encoding the memory in the autobiographical memory base [17,18]. Insomnia is typically associated with fragmented ('restless') REM-sleep, which may disrupt this overnight adaptation to experienced negative emotions and distress (e.g., [19,20]). Based on these theoretical notions and empirical findings, we suggest that targeting insomnia (i.e., long-lasting ( $\geq 3$  months) and frequent ( $\geq 3$  nights a week) problems with falling and/or staying asleep, causing daytime distress/impairments) (DSM-5-TR; [3]), could be a viable new treatment option for people with comorbid PGD and insomnia disorder.

The effect of insomnia therapy in people with PGD has thus far not been systematically investigated. One small pilot study, investigated the effect of CBT-I on prolonged grief symptoms [21]. In this study, parents bereaved of a child by cancer, who reported clinically relevant insomnia symptoms, received CBT-I. Besides reductions in sleep disturbances, they reported large within-group reductions ( $d=1.0$ ) on prolonged grief symptomatology at the 9-month follow-up and even larger reductions at the 18-month follow-up ( $d=2.6$ ). However, the sample size of the study was small and between-group effects were not significant. Eight participants received CBT-I, which were compared with eight active control participants receiving information on sleep hygiene, stress management, and mindfulness. Although this study provides a valuable preliminary indication that targeting insomnia symptoms might be beneficial in the treatment of PGD, the choice of design, the limited number of treatment-receiving participants, and the specific sample do not allow any final conclusions with regard to the efficacy of this approach. Therefore, the current study was developed to further investigate the potential effect of CBT-I in people with PGD and insomnia disorder in a well-powered study.

The problem of small sample sizes in treatment studies is common in the field of bereavement studies (cf. [5,8]). When working with small samples, randomized controlled trials are often problematic. The assumptions required for traditional parametric model-based inference are often violated, and power issues arise. The current study aims to overcome these difficulties by employing a replicated single-case experimental design (R-SCED).

Unlike traditional group designs such as randomized controlled trials, R-SCED relies on design-based inference, which does not depend on assumptions about data distributions. Instead, assumptions are made about the design of the study. Furthermore, the R-SCED relies on within-subject comparisons; in other words, each participant serves as their own control. Combined with randomized baseline lengths, frequent measurements both during the baseline and intervention phases, as well as replication across multiple individuals, this allows for causal inference with a limited number of participants [22,23]. Based on the theoretical notions and empirical evidence outlined above, we hypothesized that targeting insomnia with the gold standard, evidence-based CBT-I (e.g., [24,25]), in people dealing with comorbid PGD and insomnia disorder, will reduce both prolonged grief and insomnia symptom levels.

## Method

### Participants

Dutch-speaking adults ( $\geq 18$ ), who are bereaved of a loved one and meet the diagnostic criteria for insomnia disorder and PGD per DSM-5-TR are eligible for participation in the study. Exclusion criteria are other untreated sleeping disorders, recent shift in sleep medication ( $< 3$  months), shift work, traveling between time zones, being diagnosed with a psychotic disorder or having concrete suicidal ideations. Participants will receive financial compensation for each completed questionnaire with a maximum compensation of 180 euro.

### Procedure

The study was approved by the Medical Ethical Committee at the University Medical Center Groningen (UMCG) in the Netherlands (METc 2024/422) and was registered in the Netherlands Trial Register (NL86238.042.24) (<https://www.onderzoekmetmensen.nl/en/trial/57646>). Participants will be recruited through ongoing research, localized Google AdWords

advertisements, and websites for organizations for bereaved persons, linking to a research website. On the website, interested bereaved adults can access information about the study and can provide informed consent on a secure online survey program, Qualtrics. After providing informed consent, participants proceed to an online screener to preliminarily check for the inclusion and exclusion criteria. The screener includes questionnaires on sociodemographic and loss-related variables, prolonged grief symptoms, insomnia and other sleep disorder symptoms (see Materials).

People who meet the established cut-off values for insomnia disorder (a score above 14 on the Insomnia Severity Index; ISI) and PGD (a score of 33 or higher on the DSM-5-TR items of the Traumatic Grief Inventory Self-Report Plus; TGI-SR+; [26]) based on the screener will be invited to meet online (via a secure online meeting program) or to visit the research institute for a clinical interview to assess PGD (Traumatic Grief Inventory-Clinician Administered, TGI-CA; [27]) and insomnia disorder (Structured Clinical Interview for DSM-5 Sleep Disorders, SCISD; [28]). When participants meet the criteria for PGD, insomnia disorder and none of the exclusion criteria, they can immediately start the waiting period for CBT-I. The duration of the waiting period will be randomly assigned and lasts between five and fourteen weeks. A random number between 5 and 14 (resembling the waiting time) will be drawn using randomizer.org for each participant after the clinical interview has been conducted.

Once the waiting period has started, participants will receive weekly questionnaires assessing prolonged grief symptoms (TGI-SR+) and insomnia symptoms (ISI). These weekly questionnaires will be administered for 26 weeks, covering the waiting period (between 5–12 weeks), intervention phase (7–8 weeks), and a post-intervention/continued monitoring phase (between 4–13 weeks). Following the waiting period, all participants will receive CBT-I following the standard Dutch protocol [29] by a trained psychologist, supervised by a licensed healthcare psychologist. The therapy can be delivered in person and online, depending on the location and preferences of the participant. Three months post-treatment, participants will be asked to complete the ISI and TGI-SR+ once more (see Fig 1). We expect to start data collection in March 2026, to complete data collection in June 2027 and, report our results in October 2027.

Participants who still experience severe and disabling grief reactions (TGI-SR+ score > 33, on the DSM5-TR items; 26) at the 3-month follow-up will be offered the possibility of CBT for PGD delivered by the same psychologist. CBT for PGD is the gold standard treatment for PGD and can be effectively delivered in person and online [5,30].

## Materials

**Questionnaires.** Socio-demographic (age, sex, and education level) and loss-related characteristics (kinship to the deceased, expectedness of the loss, time since loss, and cause of death) will be assessed with a self-constructed questionnaire, included in the screener.

Prolonged grief symptoms will be assessed with the Traumatic Grief Inventory Self-Report Plus (TGI-SR+; [26]). This 22-item questionnaire is based on the TGI-SR [31] and was developed to measure all symptoms associated with the different criteria sets of grief disorders as included in the DSM-5 (persistent complex bereavement disorder), DSM-5-TR and ICD-11 (PGD). In the current study, the 12 items concerning DSM-5-TR symptoms will be used. Participants will be asked to indicate to what extent symptoms were experienced during the last month for the screener and during the last week for the repeated weekly measurement. Items are scored on a Likert scale from 1 (never) to 5 (always). Higher sum scores represent higher prolonged grief symptom levels. Total sum scores of 33 or higher are indicative of probable PGD [26].

The Dutch translation of the Insomnia Severity Index (ISI; [32,33]) will be used to assess insomnia symptoms. The seven items contain questions on nighttime and daytime symptoms and worries about sleep. Participants are asked to rate the severity of the symptoms during the last 2 weeks for the screener and during the last week for the repeated weekly measurement. Items are scored on a 5-point Likert scale from 0 to 4 (varying anchors). Higher sum scores represent more severe insomnia symptoms. Total scores range from 0 to 28. Scores of 8–14 are considered to indicate sub-threshold insomnia and scores above 14 are indicative of clinical insomnia [32].

| TIMEPOINT                                                         | TRIAL PERIOD         |   |                                 |                           |                                    |                                           |
|-------------------------------------------------------------------|----------------------|---|---------------------------------|---------------------------|------------------------------------|-------------------------------------------|
|                                                                   | Enrollment           |   | Post-randomization <sup>a</sup> |                           |                                    | Close-out                                 |
|                                                                   | -t <sub>i</sub> to 0 | 0 | Baseline<br>5-14 weeks          | Intervention<br>7-8 weeks | Continued monitoring<br>4-13 weeks | 3-month post<br>intervention<br>follow-up |
| <b>ENROLLMENT:</b>                                                |                      |   |                                 |                           |                                    |                                           |
| Eligibility screen                                                | X                    |   |                                 |                           |                                    |                                           |
| Informed consent                                                  | X                    | X |                                 |                           |                                    |                                           |
| Clinical interview                                                |                      | X |                                 |                           |                                    |                                           |
| Randomization                                                     |                      | X |                                 |                           |                                    |                                           |
| <b>INTERVENTION, CBT-I<sup>b</sup></b>                            |                      |   |                                 | →                         |                                    |                                           |
| <b>ASSESSMENTS:</b>                                               |                      |   |                                 |                           |                                    |                                           |
| <i>The Traumatic Grief Inventory Plus</i>                         | X                    | X | X                               | X                         | X                                  | X                                         |
| <i>Insomnia Severity Index</i>                                    | X                    | X | X                               | X                         | X                                  | X                                         |
| <i>The Holland Sleep Disorder Questionnaire</i>                   | X                    |   |                                 |                           |                                    |                                           |
| <i>The Traumatic Grief Inventory Clinician Administered</i>       |                      | X |                                 |                           |                                    |                                           |
| <i>The Structured Clinical Interview for DSM5 Sleep Disorders</i> |                      | X |                                 |                           |                                    |                                           |

**Fig 1. Schedule of enrollment, interventions, and assessments.** <sup>a</sup> Assessments will be conducted weekly (26 weeks in total). <sup>b</sup> Cognitive behavioural therapy for insomnia.

<https://doi.org/10.1371/journal.pone.0341802.g001>

The Holland Sleep Disorder Questionnaire (HSDQ; [34]) is a validated, Dutch, self-assessment questionnaire to screen for sleep disorders, such as insomnia disorder, sleep-related breathing disorders, and sleep-related movement disorders. The HSDQ will be used in the screener to assess for the presence of other sleep disorders.

**Clinical interviews.** To assess the inclusion and exclusion criteria; the presence of both PGD and insomnia disorder as well as ruling out the presence of other sleep disorders, we plan to administer two semi-structured clinical interviews.

The Traumatic Grief Inventory Clinician Administered (TGI-CA; [27]) will be used to assess the presence of PGD per DSM-5TR criteria. This semi-structured interview was developed to assess all current criteria for disturbed grief, including PGD per ICD-11 and DSM-5-TR. The interview questions related to the DSM-5-TR criteria will be used in the current study.

The Structured Clinical Interview for DSM-5 Sleep Disorders (SCISD; [28]) will be used to assess the presence of insomnia disorder and to rule out the presence of other sleep disorders. The SCISD is a well-validated clinical interview to assess all DSM-5 sleep disorders, including insomnia disorder.

### Treatment

The CBT-I protocol consists of six to seven weekly sessions with a booster session at one-month follow-up [29]. Participants will receive a take-home textbook during the first session which they can use to follow along with the therapy sessions.

The first two sessions focus on psycho-education, through providing information about the function and regulation of normal sleep and the consequences of disturbed sleep, sleep hygiene, a healthy lifestyle that can improve sleep and, behaviours that disrupt sleep. During session three, stimulus control and sleep restriction will be introduced. Stimulus control strengthens the association between bed (and bedroom) and sleep by only going to bed when sleepy and leaving the bed when awake for longer than 30 minutes and getting up at a fixed time. Sleep restriction restricts bedtime to the average subjective total sleep duration during the past week ( $\geq 5$  hours), thereby elevating sleep pressure, which will result in a higher relative percentage of time slept while in bed (sleep efficiency). Based on reported sleep efficiency (SE) during the past week and the participant's age, bedtimes will be extended or reduced (see [Table 1](#)). Sessions 4–6 focus on cognitive therapy, identifying and challenging misconceptions and worries about sleep that keep a person awake, and on relaxation, employing various relaxation techniques to teach a person to unwind. The final session focuses on relapse prevention. Four weeks after the final session, a booster session is offered in which key elements of the treatment will be revisited if needed.

### Sample size

Based on a prior small pilot study on CBT-I effects on prolonged grief symptoms [21] and studies on the effect of CBT-I on depression symptoms [35,36], we anticipate a large effect size (Cohen's  $d=1.0$ ) on prolonged grief and insomnia symptoms. An a priori power analysis was conducted using the single case designs shiny web-app for power calculations [37]. Based on power of .80, to detect a large effect, a total of 26 measurements per participant, of which minimally five during baseline phase, followed by minimally 12 measurements during the treatment (and continued monitoring) phase and an alpha of .05, sample size of 19 is required. A total of 20 patients will be enrolled to ensure sufficient power. CBT-I generally elicits a low dropout rate (e.g., [38]); if participants drop out before the fourth session, other participants will be recruited to replace them.

### Analysis

To test the hypothesis that prolonged grief symptoms will decline during the treatment of comorbid insomnia we will use two analytic strategies (cf. [39]). First, we will use visual inspection. The data of each participant will be plotted separately. We will then inspect changes in the mean level of prolonged grief symptoms between the baseline phase and the treatment phase. The mean level refers to the mean of all the data points in each phase. Differences in the means between phases are the first indication of a treatment effect. Next, we will inspect the slope or trend in each phase. An upward trend in symptom severity during the baseline phase vs. a downward trend during the treatment phase would be the strongest indicator of a treatment effect. Finally, we will look at the latency of change. In general, effects occurring closer to the start of the treatment phase would be a strong indicator of a direct treatment effect. Effects occurring more distal to the start of the treatment phase could potentially be due to other factors and would be considered weaker evidence for a treatment effect [40]. In the current study, we expect a delayed treatment effect since the most effective parts of the CBT-I sleep restriction and stimulus control are introduced in the third session. Therefore, the latency of change will be inspected exploratively, starting at session three.

**Table 1. Rules for extending and reducing time in bed.**

| Age       | Extend by 15 min | Reduce to average sleep time |
|-----------|------------------|------------------------------|
| < 50      | $\geq 85\%$      | $\leq 85\%$                  |
| $\geq 50$ | $\geq 80\%$      | $\leq 80\%$                  |
| > 70      | $\geq 70\%$      | $\leq 70\%$                  |

<https://doi.org/10.1371/journal.pone.0341802.t001>

Second, we will use Tau-U to quantitatively assess the differences between the baseline and intervention phase at an individual level. Tau-U is a nonoverlap index (between the phases) that corrects for possible trends in the data [41]. Hereafter, a randomization test will be used to assess the overall effect of the intervention. The randomization test is based on the random assignment of baseline length (i.e., moment of phase change; [42]). This non-parametric test compares the mean difference of all possible baselines with the mean difference between the actual baseline and treatment phase. The place in the rank order of the mean differences determines the p-value of the test. The null hypothesis is that there is no difference between the baseline and treatment phases. The alternative hypothesis is that there is a difference between the two phases. To check for the potential effects of receiving treatment through telehealth versus face-to-face treatment, we will also run the randomization tests for the two treatment options separately.

## Discussion

This study aims to elucidate the effects of an innovative approach to targeting PGD by offering CBT-I for people dealing with both insomnia and PGD. The relationship between prolonged grief symptoms and insomnia symptoms has been well established (see, e.g., [13–16]). To our knowledge, only one small-scale study has examined the effect of CBT-I on prolonged grief symptoms [21]. Although this study showed promising results, the study was underpowered due to significant drop-out. Thus, the results are uncertain and warrant a reexamination. Furthermore, in this earlier study, the authors did not assess whether participants met the diagnostic criteria for PGD and insomnia disorder. The present study, is the first direct investigation into the effect of CBT-I on PGD in people dealing with both PGD and insomnia disorder and uses a design specifically suited for small samples.

Although little experimental evidence exists for the hypothesized effect of CBT-I on PGD, the effects of CBT-I on other affective and stress-related disorders has been well documented (for a review see: [43]). For example, sleep problems have been identified as a risk factor for relapse in depression [44] and targeting sleep problems may prevent the development of major depressive disorder (MDD; [45]). Treating sleep problems co-occurring with depression and PTSD symptomatology has been shown to not only diminish sleep problems but also ameliorate depressive and PTSD symptomatology ([46,47]; for a review, see [43]). Thus, it is not unlikely that similar effects will occur when applying sleep therapy to people with insomnia disorder and PGD.

Furthermore, it is important to understand whether evidence-based CBT-I is effective in the bereaved population. Untreated insomnia puts people at risk for several other affective and stress-related disorders, including depression [44,48], and physical disorders, such as heart diseases (e.g., [49]). Establishing the effects of CBT-I in this population may thus be helpful to improve mental and physical health within the bereaved population, especially considering that the bereaved population experiences more physical problems than their non-bereaved counterparts (e.g., [50]).

It is important to acknowledge that the current study has some potential limitations and bottlenecks. CBT-I is an intensive treatment that can be physically demanding and requires a high level of commitment from the patient [51]. However, it does not include emotionally taxing techniques such as exposure to reminders of the death of the loved one, which is central to CBT for PGD [9]. Thus, it is likely less emotionally overwhelming than CBT for prolonged grief, potentially leading to lower drop-out.

Next, although the study design requires a limited number of participants, the included participants are required to complete weekly questionnaires over the course of six months. This intensive monitoring could potentially result in a higher level of drop-out compared to a study design in which participants are required to complete questionnaires fewer times. We will try to address this problem by replacing dropouts, providing both monetary incentives for each weekly questionnaire as well as by sending reminders, a strategy that has previously been employed successfully, resulting in high completion rates [52].

Additionally, by design, both the participants and the researcher/therapist cannot be blinded, and thus, there is a potential for bias. For example, participants who are familiar with the goal of the study might be inclined to report favorable outcomes. Finally, we will use a convenience sample which might limit the generalizability of the findings.

Notwithstanding these limitations, the study will provide valuable insights into the effect of CBT-I in people with co-occurring insomnia and PGD. This could potentially set the stage for a less emotionally demanding, alternative treatment approach for PGD.

## Supporting information

### S1 Checklist. Spirit checklist.

(DOCX)

### S1 File. Onderzoeksprotocol versie 3 dd. 03062025.

(PDF)

## Author contributions

**Conceptualization:** Thomas A. de Lang, Peter J. de Jong, Marike Lancel, Jaap Lancee, Maarten C. Eisma.

**Funding acquisition:** Thomas A. de Lang, Peter J. de Jong, Marike Lancel, Maarten C. Eisma.

**Methodology:** Thomas A. de Lang, Jaap Lancee, Maarten C. Eisma.

**Supervision:** Peter J. de Jong, Marike Lancel, Maarten C. Eisma.

**Writing – original draft:** Thomas A. de Lang.

**Writing – review & editing:** Peter J. de Jong, Marike Lancel, Jaap Lancee, Maarten C. Eisma.

## References

1. Rosner R, Comtesse H, Vogel A, Doering BK. Prevalence of prolonged grief disorder. *J Affect Disord.* 2021;287:301–7. <https://doi.org/10.1016/j.jad.2021.03.058> PMID: [33812243](https://pubmed.ncbi.nlm.nih.gov/33812243/)
2. Trembl J, Brähler E, Kersting A. Prevalence, factor structure and correlates of DSM-5-TR criteria for prolonged grief disorder. *Front Psychiatry.* 2022;13:880380. <https://doi.org/10.3389/fpsy.2022.880380>
3. American Psychiatric Association. *Diagnostic and Statistical Manual of Mental Disorders.* 2022.
4. World Health Organization. *International statistical classification of diseases and related health problems [Internet].* 2019. Available from: <https://icd.who.int/>
5. Komischke-Konnerup KB, Zachariae R, Boelen PA, Marengo MM, O'Connor M. Grief-focused cognitive behavioral therapies for prolonged grief symptoms: A systematic review and meta-analysis. *J Consult Clin Psychol.* 2024;92(4):236–48. <https://doi.org/10.1037/ccp0000884> PMID: [38573714](https://pubmed.ncbi.nlm.nih.gov/38573714/)
6. Srivastava T, Lee K, Ehrenkranz R, Cozzolino PJ, Wise FA, Burns M, et al. The efficacy of psychotherapeutic interventions for prolonged grief disorder: A systematic review. *J Affect Disord.* 2025;380:561–75. <https://doi.org/10.1016/j.jad.2025.03.173> PMID: [40180039](https://pubmed.ncbi.nlm.nih.gov/40180039/)
7. Doering BK, Eisma MC. Treatment for complicated grief: state of the science and ways forward. *Curr Opin Psychiatry.* 2016;29(5):286–91. <https://doi.org/10.1097/YCO.0000000000000263> PMID: [27429216](https://pubmed.ncbi.nlm.nih.gov/27429216/)
8. Johannsen M, Damholdt MF, Zachariae R, Lundorff M, Farver-Vestergaard I, O'Connor M. Psychological interventions for grief in adults: A systematic review and meta-analysis of randomized controlled trials. *J Affect Disord.* 2019;253:69–86. <https://doi.org/10.1016/j.jad.2019.04.065> PMID: [31029856](https://pubmed.ncbi.nlm.nih.gov/31029856/)
9. Boelen PA, van den Hout MA, van den Bout J. A Cognitive-Behavioral Conceptualization of Complicated Grief. *Clinical Psychology: Science and Practice.* 2006;13(2):109–28. <https://doi.org/10.1111/j.1468-2850.2006.00013.x>
10. Bryant RA, Azevedo S, Yadav S, Cahill C, Kenny L, Maccallum F, et al. Cognitive Behavior Therapy vs Mindfulness in Treatment of Prolonged Grief Disorder: A Randomized Clinical Trial. *JAMA Psychiatry.* 2024;81(7):646–54. <https://doi.org/10.1001/jamapsychiatry.2024.0432> PMID: [38656428](https://pubmed.ncbi.nlm.nih.gov/38656428/)
11. Kowalski SD, Bondmass MD. Physiological and psychological symptoms of grief in widows. *Res Nurs Health.* 2008;31(1):23–30. <https://doi.org/10.1002/nur.20228> PMID: [18161825](https://pubmed.ncbi.nlm.nih.gov/18161825/)
12. Monk TH, Germain A, Reynolds CF. Sleep Disturbance in Bereavement. *Psychiatr Ann.* 2008;38(10):671–5. <https://doi.org/10.3928/00485713-20081001-06> PMID: [20179790](https://pubmed.ncbi.nlm.nih.gov/20179790/)
13. Lancel M, Stroebe M, Eisma MC. Sleep disturbances in bereavement: A systematic review. *Sleep Med Rev.* 2020;53:101331. <https://doi.org/10.1016/j.smrv.2020.101331> PMID: [32505968](https://pubmed.ncbi.nlm.nih.gov/32505968/)
14. de Lang TA, Buyukcan-Tetik A, de Jong PJ, Lancel M, Eisma MC. Cross-Lagged Analyses of Prolonged Grief and Depression Symptoms With Insomnia Symptoms. *Behav Ther.* 2023;54(3):510–23. <https://doi.org/10.1016/j.beth.2022.12.004> PMID: [37088507](https://pubmed.ncbi.nlm.nih.gov/37088507/)

15. de Feijter M, O'Connor M-F, Arizmendi BJ, Ikram MA, Luik AI. The longitudinal association of actigraphy-estimated sleep with grief in middle-aged and elderly persons. *J Psychiatr Res*. 2021;137:66–72. <https://doi.org/10.1016/j.jpsychires.2021.02.042> PMID: [33657460](https://pubmed.ncbi.nlm.nih.gov/33657460/)
16. de Lang TA, Buyukcan-Tetik A, de Jong PJ, Lancel M, Eisma MC. Trajectories of insomnia following bereavement. *Sleep Med*. 2024;114:159–66. <https://doi.org/10.1016/j.sleep.2023.12.009> PMID: [38194898](https://pubmed.ncbi.nlm.nih.gov/38194898/)
17. Goldstein AN, Walker MP. The role of sleep in emotional brain function. *Annu Rev Clin Psychol*. 2014;10:679–708. <https://doi.org/10.1146/annurev-clinpsy-032813-153716> PMID: [24499013](https://pubmed.ncbi.nlm.nih.gov/24499013/)
18. Walker MP, van der Helm E. Overnight therapy? The role of sleep in emotional brain processing. *Psychol Bull*. 2009;135(5):731–48. <https://doi.org/10.1037/a0016570> PMID: [19702380](https://pubmed.ncbi.nlm.nih.gov/19702380/)
19. Riemann D, Spiegelhalter K, Nissen C, Hirscher V, Baglioni C, Feige B. REM sleep instability – a new pathway for insomnia? *Pharmacopsychiatry*. 2012;45(5):167–76.
20. Vandekerckhove M, Wang Y-L. Emotion, emotion regulation and sleep: An intimate relationship. *AIMS Neurosci*. 2017;5(1):1–17. <https://doi.org/10.3934/Neuroscience.2018.1.1> PMID: [32341948](https://pubmed.ncbi.nlm.nih.gov/32341948/)
21. Sveen J, Jernelöv S, Pohlkamp L, Kreicbergs U, Kaldø V. Feasibility and preliminary efficacy of guided internet-delivered cognitive behavioral therapy for insomnia after the loss of a child to cancer: Randomized controlled trial. *Internet Interv*. 2021;25:100409. <https://doi.org/10.1016/j.invent.2021.100409> PMID: [34401368](https://pubmed.ncbi.nlm.nih.gov/34401368/)
22. Maric M, van der Werff V. Single-Case Experimental Designs in Clinical Intervention Research. In: *Small Sample Size Solutions* [Internet]. London: Routledge; 2020. p. 102–11. Available from: <https://www.taylorfrancis.com/books/9780429273872/chapters/10.4324/9780429273872-9>
23. Morley S. *Single-Case Methods in Clinical Psychology A Practical Guide*. 2018.
24. Mitchell MD, Gehrman P, Perlis M, Umscheid CA. Comparative Effectiveness of Cognitive Behavioral Therapy for Insomnia: A Systematic Review. *FOC*. 2014;12(1):80–9. <https://doi.org/10.1176/appi.focus.12.1.80>
25. Riemann D, Espie CA, Altena E, Arnardottir ES, Baglioni C, Bassetti CLA, et al. The European Insomnia Guideline: An update on the diagnosis and treatment of insomnia 2023. *Journal of Sleep Research*. 2023;32(6):1–36.
26. Lenferink LIM, Eisma MC, Smid GE, de Keijser J, Boelen PA. Valid measurement of DSM-5 persistent complex bereavement disorder and DSM-5-TR and ICD-11 prolonged grief disorder: The Traumatic Grief Inventory-Self Report Plus (TGI-SR+). *Compr Psychiatry*. 2022;112:152281. <https://doi.org/10.1016/j.comppsy.2021.152281> PMID: [34700189](https://pubmed.ncbi.nlm.nih.gov/34700189/)
27. Lenferink LIM, Franzen M, Ten Klooster PM, Knaevelsrud C, Boelen PA, Heeke C. The Traumatic Grief Inventory-Clinician Administered: A psychometric evaluation of a new interview for ICD-11 and DSM-5-TR prolonged grief disorder severity and probable caseness. *J Affect Disord*. 2023;330:188–97. <https://doi.org/10.1016/j.jad.2023.03.006> PMID: [36907465](https://pubmed.ncbi.nlm.nih.gov/36907465/)
28. Taylor DJ, Wilkerson AK, Pruiksma KE, Williams JM, Ruggero CJ, Hale W, et al. Reliability of the Structured Clinical Interview for DSM-5 Sleep Disorders Module. *J Clin Sleep Med*. 2018;14(3):459–64. <https://doi.org/10.5664/jcsm.7000> PMID: [29458705](https://pubmed.ncbi.nlm.nih.gov/29458705/)
29. Verbeek I, van de Laar M. *Behandeling van langdurige slapeloosheid* [Internet]. Houten: Bohn Stafleu van Loghum; 2023. (Protocolen voor de ggz). Available from: <https://link.springer.com/10.1007/978-90-368-2946-5>
30. Wagner B, Rosenberg N, Hofmann L, Maass U. Web-Based Bereavement Care: A Systematic Review and Meta-Analysis. *Front Psychiatry*. 2020;11:525. <https://doi.org/10.3389/fpsy.2020.00525> PMID: [32670101](https://pubmed.ncbi.nlm.nih.gov/32670101/)
31. Boelen PA, Smid GE. The Traumatic Grief Inventory Self-Report Version (TGI-SR): Introduction and Preliminary Psychometric Evaluation. *Journal of Loss and Trauma*. 2017;22(3):196–212. <https://doi.org/10.1080/15325024.2017.1284488>
32. Bastien CH, Vallières A, Morin CM. Validation of the Insomnia Severity Index as an outcome measure for insomnia research. *Sleep Med*. 2001;2(4):297–307. [https://doi.org/10.1016/s1389-9457\(00\)00065-4](https://doi.org/10.1016/s1389-9457(00)00065-4) PMID: [11438246](https://pubmed.ncbi.nlm.nih.gov/11438246/)
33. Morin CM. *Insomnia: Psychological assessment and management*. New York, London: The Guilford Press; 1993.
34. Kerkhof GA, Geuke MEH, Brouwer A, Rijsman RM, Schimsheimer RJ, Van Kasteel V. Holland Sleep Disorders Questionnaire: a new sleep disorders questionnaire based on the International Classification of Sleep Disorders-2. *J Sleep Res*. 2013;22(1):104–7. <https://doi.org/10.1111/j.1365-2869.2012.01041.x> PMID: [22924964](https://pubmed.ncbi.nlm.nih.gov/22924964/)
35. Christensen H, Batterham PJ, Gosling JA, Ritterband LM, Griffiths KM, Thorndike FP, et al. Effectiveness of an online insomnia program (SHUTi) for prevention of depressive episodes (the GoodNight Study): a randomised controlled trial. *Lancet Psychiatry*. 2016;3(4):333–41. [https://doi.org/10.1016/S2215-0366\(15\)00536-2](https://doi.org/10.1016/S2215-0366(15)00536-2) PMID: [26827250](https://pubmed.ncbi.nlm.nih.gov/26827250/)
36. Van der Zweerde T, Lancee J, Slottje P, Bosmans JE, Van Someren EJW, van Straten A. Nurse-Guided Internet-Delivered Cognitive Behavioral Therapy for Insomnia in General Practice: Results from a Pragmatic Randomized Clinical Trial. *Psychother Psychosom*. 2020;89(3):174–84. <https://doi.org/10.1159/000505600> PMID: [32069463](https://pubmed.ncbi.nlm.nih.gov/32069463/)
37. Bouwmeester S, Jongerling J. Power of a randomization test in a single case multiple baseline AB design. *PLoS One*. 2020;15(2):e0228355. <https://doi.org/10.1371/journal.pone.0228355> PMID: [32027683](https://pubmed.ncbi.nlm.nih.gov/32027683/)
38. Lancee J, van Straten A, Morina N, Kaldø V, Kamphuis JH. Guided Online or Face-to-Face Cognitive Behavioral Treatment for Insomnia: A Randomized Wait-List Controlled Trial. *Sleep*. 2016;39(1):183–91. <https://doi.org/10.5665/sleep.5344> PMID: [26414893](https://pubmed.ncbi.nlm.nih.gov/26414893/)
39. Tanius R, Onghena P. Randomized single-case experimental designs in healthcare research: what, why, and how?. *Healthcare*. 2019;7(4):143.

40. Kazdin AE. Single-case experimental designs. Evaluating interventions in research and clinical practice. *Behav Res Ther.* 2019;117:3–17. <https://doi.org/10.1016/j.brat.2018.11.015> PMID: [30527785](https://pubmed.ncbi.nlm.nih.gov/30527785/)
41. Parker RI, Vannest KJ, Davis JL, Sauber SB. Combining nonoverlap and trend for single-case research: Tau-U. *Behav Ther.* 2011;42(2):284–99. <https://doi.org/10.1016/j.beth.2010.08.006> PMID: [21496513](https://pubmed.ncbi.nlm.nih.gov/21496513/)
42. Michiels B, Onghena P. Randomized single-case AB phase designs: Prospects and pitfalls. *Behav Res Methods.* 2019;51(6):2454–76. <https://doi.org/10.3758/s13428-018-1084-x> PMID: [30022457](https://pubmed.ncbi.nlm.nih.gov/30022457/)
43. Hertenstein E, Trinca E, Wunderlin M, Schneider CL, Züst MA, Fehér KD, et al. Cognitive behavioral therapy for insomnia in patients with mental disorders and comorbid insomnia: A systematic review and meta-analysis. *Sleep Med Rev.* 2022;62:101597. <https://doi.org/10.1016/j.smr.2022.101597> PMID: [35240417](https://pubmed.ncbi.nlm.nih.gov/35240417/)
44. Baglioni C, Battagliese G, Feige B, Spiegelhalder K, Nissen C, Voderholzer U, et al. Insomnia as a predictor of depression: a meta-analytic evaluation of longitudinal epidemiological studies. *J Affect Disord.* 2011;135(1–3):10–9. <https://doi.org/10.1016/j.jad.2011.01.011> PMID: [21300408](https://pubmed.ncbi.nlm.nih.gov/21300408/)
45. Irwin MR, Carrillo C, Sadeghi N, Bjurstrom MF, Breen EC, Olmstead R. Prevention of Incident and Recurrent Major Depression in Older Adults With Insomnia: A Randomized Clinical Trial. *JAMA Psychiatry.* 2022;79(1):33–41. <https://doi.org/10.1001/jamapsychiatry.2021.3422> PMID: [34817561](https://pubmed.ncbi.nlm.nih.gov/34817561/)
46. Gee B, Orchard F, Clarke E, Joy A, Clarke T, Reynolds S. The effect of non-pharmacological sleep interventions on depression symptoms: A meta-analysis of randomised controlled trials. *Sleep Med Rev.* 2019;43:118–28. <https://doi.org/10.1016/j.smr.2018.09.004> PMID: [30579141](https://pubmed.ncbi.nlm.nih.gov/30579141/)
47. Ho FY-Y, Chan CS, Tang KN-S. Cognitive-behavioral therapy for sleep disturbances in treating posttraumatic stress disorder symptoms: A meta-analysis of randomized controlled trials. *Clin Psychol Rev.* 2016;43:90–102. <https://doi.org/10.1016/j.cpr.2015.09.005> PMID: [26439674](https://pubmed.ncbi.nlm.nih.gov/26439674/)
48. Cheng P, Kalmbach DA, Tallent G, Joseph CL, Espie CA, Drake CL. Depression prevention via digital cognitive behavioral therapy for insomnia: a randomized controlled trial. *Sleep.* 2019;42(10):zsz150. <https://doi.org/10.1093/sleep/zsz150> PMID: [31535688](https://pubmed.ncbi.nlm.nih.gov/31535688/)
49. Fernandez-Mendoza J, Vgontzas AN. Insomnia and its impact on physical and mental health. *Curr Psychiatry Rep.* 2013;15(12):418. <https://doi.org/10.1007/s11920-013-0418-8> PMID: [24189774](https://pubmed.ncbi.nlm.nih.gov/24189774/)
50. Stroebe M, Schut H, Stroebe W. Health outcomes of bereavement. *Lancet.* 2007;370(9603):1960–73. [https://doi.org/10.1016/S0140-6736\(07\)61816-9](https://doi.org/10.1016/S0140-6736(07)61816-9) PMID: [18068517](https://pubmed.ncbi.nlm.nih.gov/18068517/)
51. Mellor A, Kavaliotis E, Mascaro L, Drummond SPA. Approaches to the assessment of adherence to CBT-I, predictors of adherence, and the association of adherence to outcomes: A systematic review. *Sleep Med Rev.* 2022;63:101620. <https://doi.org/10.1016/j.smr.2022.101620> PMID: [35398650](https://pubmed.ncbi.nlm.nih.gov/35398650/)
52. Mintz EH, Toner ER, Skolnik AM, Pan A, Frumkin MR, Baker AW, et al. Ecological momentary assessment in prolonged grief research: Feasibility, acceptability, and measurement reactivity. *Death Stud.* 2026;50(3):482–94. <https://doi.org/10.1080/07481187.2024.2433109> PMID: [39622793](https://pubmed.ncbi.nlm.nih.gov/39622793/)
